# Supplementary material
Source: ML conference proceedings conference paper supplement (https://openaccess.thecvf.com/content/CVPR2023/html/Wang_Multi-Agent_Automated_Machine_CVPR_2023_paper.html)
Supplement: Supplementary file 1 [file Wang_Multi-Agent_Automated_Machine_CVPR_2023_supplemental.pdf]

## A. MA2ML and MA2ML-Lite on CIFAR-100

Figure 6 presents the average reward curves of top-30 pipelines and the scatter plot of the average reward in each batch of MA2ML and MA2ML-Lite on CIFAR-100. The large lead of MA2ML over MA2ML-Lite validates the effectiveness of MA2ML.

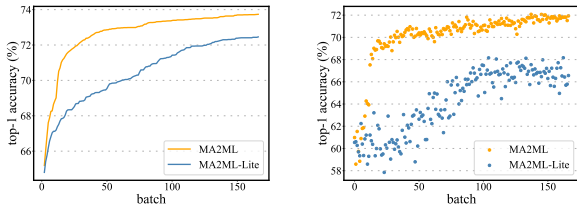

Figure 6. Learning patterns of MA2ML and MA2ML-Lite on CIFAR-100. Left: average accuracy curves of top-30 pipelines in terms of batch numbers. Right: the scatter plot for the average accuracy of pipelines in each batch.

## B. Experiment Details

**Detailed search space.** In Section 4.2, we consider 15 augmentation operations, including ShearX/Y, TranslateX/Y, Rotate, AutoContrast, Invert, Equalize, Solarize, Posterize, Contrast, Color, Brightness, Sharpness, and Cutout. On CIFAR-10 and CIFAR-100, we adopt the same search space of NASNet [54] for NAS, and use [0.16, 0.08, 0.04, 0.02] and [0.0008, 0.0004, 0.0002, 0.0001] as the search space of warmup learning rate and weight decay for HPO, respectively. On ImageNet-200, we utilize the same search space of FBNetV3 [5] to form NAS and HPO.

**RL setting.** In MA2ML and MA2ML-Lite, for each module we use a one-layer LSTM controller with 100 hidden units to generate action distributions. On CIFAR-10, CIFAR-100 and ImageNet-200 datasets, we set  $\eta_\theta = 0.0004$  and  $\eta_\phi = 0.005$  for the learning rate of policy parameter  $\theta$  in (13) and critic parameter  $\phi$  in (11), respectively. We set  $\tau = 0.004$  on CIFAR and  $\tau = 0.012$  on ImageNet-200 as the moving average parameter for the update of target policy parameter  $\bar{\theta}$  in (14). We set  $\lambda = 0.2$  as the coefficient of KL divergence regularization.

**Training details.** For the short-term training on CIFAR-10 and CIFAR-100 in the search, the batch size is set to 64 per GPU. Two GPUs are used to train a model for 12 epochs with 1 epoch warm-up. For the retraining, the batch size is set to 64 per GPU. Eight GPUs are used to train a model for 600 epochs with 5 epochs warm-up. The learning rate of the model is 4 times larger than that of the short-term training. For the short-term training on ImageNet-200, the batch size is set to 128 per GPU. Eight GPUs are used to train a model for 100 epochs with 5 epochs warmup. For re-

training on ImageNet, the batch size is set as 256 per GPU. Sixteen GPUs are used to train a model for 400 epochs with 5 epochs warmup. The learning rate of the model is 4 times larger than that of the short-term training.

**Detailed results.** On CIFAR-10 and CIFAR-100, the best searched pipeline is trained for 5 times. On CIFAR-10, MA2ML achieves 97.72%, 97.84%, 97.85%, 97.75%, and 97.7%, while MA2ML-Lite achieves 97.66%, 97.59%, 97.85%, 97.6%8, 97.73% top-1 accuracy. On CIFAR-100, MA2ML achieves 84.83%, 85.14%, 85.15%, 85.14%, and 85.15%, while MA2ML-Lite achieves 84.68%, 84.92%, 84.94%, 84.73%, 84.75% top-1 accuracy. On ImageNet, the searched pipeline is trained for a one time. MA2ML-D/E/F achieve 80.5%/80.7%/81.1% top-1 accuracy under 795M/890M/973M FLOPs.

**Results on ImageNet without constraints of FLOPs.** On ImageNet, we also test MA2ML and MA2ML-Lite without any constraints of FLOPs. We take the reward function  $R = \text{Acc}(m)$ , and keep other settings the same as experiments with constraints of FLOPs on ImageNet. MA2ML achieves 82.0% with 1.4G FLOPs and MA2ML-Lite 81.5%/1.2G, (both search for 1000 pipelines and select top-20 for final training and testing on ImageNet).

**Search cost.** Tesla V100s are used for experiments. On CIFAR-10/100 the search cost of MA2ML is 300 GPU days. On ImageNet the search cost is 2000 GPU days. For comparison, NASNet spends 2000 GPU days for search on CIFAR-10 with the same search space, which is much larger than MA2ML as the off-policy learning of MA2ML significantly improves sampling efficiency.
